# Supplementary material
Source: Research Square preprint supplement (doi:10.21203/rs.3.rs-9067396/v1)
Supplement: Supplementary file 1 [file 5135f96afd64893d021eb8a1.docx]

Calculation Face Validation - Respondent (adolescents) views

1. Clearity

| Not clear | Almost clear | clear | Very clear |
| --- | --- | --- | --- |
| 1 | 2 | 3 | 4 |
| 0 | 0 | 1 | 1 |

Table 1. Clearity rating calculation

| Q/ RATER | *A1 |  | A2 |  | A3 |  | A4 |  | A5 |  | A6 |  | A7 |  | A8 |  | A9 |  | A10 |  |  | SUM OF RATER | I-FVI | UV |
| --- | --- | --- | --- | --- | --- | --- | --- | --- | --- | --- | --- | --- | --- | --- | --- | --- | --- | --- | --- | --- | --- | --- | --- | --- |
| S1 | 4 | 1 | 4 | 1 | 4 | 1 | 4 | 1 | 4 | 1 | 3 | 1 | 4 | 1 | 4 | 1 | 4 | 1 | 3 | 1 |  | 10 | 1 | 1 |
| S2 | 4 | 1 | 4 | 1 | 4 | 1 | 4 | 1 | 4 | 1 | 3 | 1 | 3 | 1 | 4 | 1 | 4 | 1 | 4 | 1 |  | 10 | 1 | 1 |
| S3 | 3 | 1 | 4 | 1 | 4 | 1 | 3 | 1 | 4 | 1 | 3 | 1 | 3 | 1 | 4 | 1 | 3 | 1 | 3 | 1 |  | 10 | 1 | 1 |
| S4 | 2 | 0 | 4 | 1 | 4 | 1 | 4 | 1 | 4 | 1 | 3 | 1 | 4 | 1 | 4 | 1 | 2 | 0 | 4 | 1 |  | 8 | 0.8 | 0 |
| S5 | 3 | 1 | 4 | 1 | 3 | 1 | 4 | 1 | 3 | 1 | 3 | 1 | 3 | 1 | 4 | 1 | 3 | 1 | 3 | 1 |  | 10 | 1 | 1 |
| S6 | 4 | 1 | 4 | 1 | 3 | 1 | 4 | 1 | 4 | 1 | 3 | 1 | 2 | 0 | 4 | 1 | 4 | 1 | 3 | 1 |  | 9 | 0.9 | 0 |
| S7 | 3 | 1 | 4 | 1 | 4 | 1 | 4 | 1 | 4 | 1 | 3 | 1 | 3 | 1 | 4 | 1 | 3 | 1 | 3 | 1 |  | 10 | 1 | 1 |
| S8 | 4 | 1 | 4 | 1 | 4 | 1 | 4 | 1 | 4 | 1 | 4 | 1 | 3 | 1 | 4 | 1 | 4 | 1 | 3 | 1 |  | 10 | 1 | 1 |
| S9 | 4 | 1 | 4 | 1 | 4 | 1 | 4 | 1 | 4 | 1 | 4 | 1 | 3 | 1 | 4 | 1 | 4 | 1 | 3 | 1 |  | 10 | 1 | 1 |
| S10 | 3 | 1 | 4 | 1 | 4 | 1 | 3 | 1 | 4 | 1 | 4 | 1 | 4 | 1 | 4 | 1 | 3 | 1 | 4 | 1 |  | 10 | 1 | 1 |
|  |  |  |  |  |  |  |  |  |  |  |  |  |  |  |  |  |  |  |  |  |  |  |  |  |
|  |  | **9** |  | **10** |  | **10** |  | **10** |  | **10** |  | **10** |  | **9** |  | **10** |  | **9** |  | **10** |  |  |  |  |
| Proposition clearity |  | **0.9** |  | **1** |  | **1** |  | **1** |  | **1** |  | **1** |  | **0.9** |  | **1** |  | **0.9** |  | **1** |  | **S-FVI** | **9.70** |  |
|  |  |  |  |  |  |  |  |  |  |  |  |  |  |  |  |  |  |  |  |  | **S-FVI/Ave** | | **0.97** |  |
|  |  |  |  |  |  |  |  |  |  |  |  |  |  |  |  |  |  |  | SUM | **9.9** |  |  |  | **8** |
|  |  |  |  |  |  |  |  |  |  |  |  | Proposition clearity across raters | | | | | | | | **0.99** |  | **S-FVI/UA** | | **0.80** |

*A= participant (adolescents), Q= Questionnaire

Scores of FVI >0.83 for 10 raters are acceptable (Yusoff, 2019)

1. Comprehensive

| Not understandable | Almost understand | Understand | Very understandable |
| --- | --- | --- | --- |
| 1 | 2 | 3 | 4 |
| 0 | 0 | 1 | 1 |

Table 2: Comprehensive rating calculation

| Q/ RATER | A1 |  | A2 |  | A3 |  | A4 |  | A5 |  | A6 |  | A7 |  | A8 |  | A9 |  | A10 |  |  | SUM OF RATER | I-FVI | UV |
| --- | --- | --- | --- | --- | --- | --- | --- | --- | --- | --- | --- | --- | --- | --- | --- | --- | --- | --- | --- | --- | --- | --- | --- | --- |
| S1 | 4 | 1 | 4 | 1 | 4 | 1 | 4 | 1 | 4 | 1 | 4 | 1 | 4 | 1 | 4 | 1 | 4 | 1 | 4 | 1 |  | **10** | **1** | **1** |
| S2 | 4 | 1 | 4 | 1 | 4 | 1 | 4 | 1 | 4 | 1 | 4 | 1 | 4 | 1 | 4 | 1 | 4 | 1 | 4 | 1 |  | **10** | **1** | **1** |
| S3 | 3 | 1 | 4 | 1 | 4 | 1 | 4 | 1 | 4 | 1 | 4 | 1 | 3 | 1 | 4 | 1 | 3 | 1 | 3 | 1 |  | **10** | **1** | **1** |
| S4 | 3 | 1 | 4 | 1 | 4 | 1 | 4 | 1 | 4 | 1 | 4 | 1 | 4 | 1 | 4 | 1 | 3 | 1 | 4 | 1 |  | **10** | **1** | **1** |
| S5 | 3 | 1 | 4 | 1 | 4 | 1 | 3 | 1 | 3 | 1 | 3 | 1 | 4 | 1 | 4 | 1 | 3 | 1 | 4 | 1 |  | **10** | **1** | **1** |
| S6 | 4 | 1 | 4 | 1 | 4 | 1 | 4 | 1 | 4 | 1 | 4 | 1 | 3 | 1 | 4 | 1 | 4 | 1 | 3 | 1 |  | **10** | **1** | **1** |
| S7 | 3 | 1 | 4 | 1 | 4 | 1 | 4 | 1 | 4 | 1 | 4 | 1 | 3 | 1 | 4 | 1 | 3 | 1 | 3 | 1 |  | **10** | **1** | **1** |
| S8 | 4 | 1 | 4 | 1 | 4 | 1 | 4 | 1 | 4 | 1 | 4 | 1 | 3 | 1 | 4 | 1 | 4 | 1 | 3 | 1 |  | **10** | **1** | **1** |
| S9 | 4 | 1 | 4 | 1 | 4 | 1 | 4 | 1 | 4 | 1 | 4 | 1 | 3 | 1 | 4 | 1 | 4 | 1 | 3 | 1 |  | **10** | **1** | **1** |
| S10 | 2 | 0 | 4 | 1 | 4 | 1 | 3 | 1 | 4 | 1 | 4 | 1 | 4 | 1 | 4 | 1 | 4 | 1 | 4 | 1 |  | **9** | **0.9** | **0** |
|  |  |  |  |  |  |  |  |  |  |  |  |  |  |  |  |  |  |  |  |  |  |  |  |  |
|  |  | **9** |  | **10** |  | **10** |  | **10** |  | **10** |  | **10** |  | **10** |  | **10** |  | **10** |  | **10** |  |  |  |  |
| Proposition comprehensive |  | **0.9** |  | **1** |  | **1** |  | **1** |  | **1** |  | **1** |  | **1** |  | **1** |  | **1** |  | **1** |  | **S-FVI** | **9.90** |  |
|  |  |  |  |  |  |  |  |  |  |  |  |  |  |  |  |  |  |  |  |  | **S-FVI/Ave** | | **0.99** |  |
|  |  |  |  |  |  |  |  |  |  |  |  |  |  |  |  |  |  |  | SUM | **9.9** |  |  |  | 9 |
|  |  |  |  |  |  |  |  |  |  |  |  | Proposition is comprehensive across raters | | | | | | | | **0.99** |  | **S-FVI/UA** | | **0.90** |

Scores of FVI >0.83 for 10 raters are acceptable (Yusoff, 2019), (Zamanzadeh et al., 2015),

Yusoff, M. S. B. (2019). ABC of Response Process Validation and Face Validity Index Calculation. *Education in Medicine Journal*, *11*(3), 55–61. https://doi.org/10.21315/eimj2019.11.3.6

Zamanzadeh, V., Ghahramanian, A., Rassouli, M., Abbaszadeh, A., Alavi-Majd, H., & Nikanfar, A.-R. (2015). Design and Implementation Content Validity Study: Development of an instrument for measuring Patient-Centered Communication. *Journal of Caring Sciences*, *4*(2), 165–178. https://doi.org/10.15171/jcs.2015.017
