# Supplementary material
Source: Research Square preprint supplement (doi:10.21203/rs.3.rs-9067396/v1)
Supplement: Supplementary file 2 [file 60428a1cf36076681a6cff64.docx]

**Table 1**. Item-level reliability and EFA statistics for the adapted HLSAC Malay version Questionnaire

|  |  |  | **Reliability analysis** | | **EFA** | |
| --- | --- | --- | --- | --- | --- | --- |
| **Kod item** |  | **Item** | **Item–total correlation** | **α if item deleted** | **Factor Loading** | **Uniqueness** |
| HL1 | *English* | *I have good information about health.* | 0.435 | 0.794 | 0.690 | 0.524 |
| Malay | Saya mempunyai maklumat yang baik tentang kesihatan. |
| HL2 | *English* | *I am able to offer ideas on how to improve health in my immediate surroundings when necessary (e.g., a nearby place or area, family, friends).* | 0.455 | 0.792 | 0.624 | 0.611 |
| Malay | Saya boleh memberi pandangan (idea) dengan orang lain di sekeliling saya untuk meningkatkan kesihatan mereka (contohnya, kepada keluarga, kawan-kawan, jiran). |
| HL3 | *English* | *I can compare health-related information from different sources.* | 0.531 | 0.783 | 0.600 | 0.640 |
| Malay | Saya boleh membandingkan maklumat berkaitan kesihatan daripada pelbagai sumber. |
| HL4 | *English* | *I can follow the instructions given to me by healthcare (e.g. nurse, doctor, health education officer).* | 0.402 | 0.797 | 0.551 | 0.696 |
| Malay | Saya boleh mengikuti nasihat /panduan yang diberikan oleh anggota kesihatan (contohnya, jururawat, doktor, pegawai pendidikan kesihatan). |
| HL5 | *English* | *I can easily give examples of things that promote health.* | 0.442 | 0.793 | 0.518 | 0.732 |
| Malay | Saya dengan mudah boleh memberi contoh perkara yang menggalakan penjagaan kesihatan. |
| HL6 | *English* | *I can judge how my own actions affect the surrounding natural environment.* | 0.443 | 0.793 | 0.503 | 0.747 |
| Malay | Saya boleh menilai bagaimana tindakan saya memberi kesan kepada sekeliling saya |
| HL7 | *English* | *I can find health-related information that is easy for me to understand when necesasery.* | 0.552 | 0.781 | 0.490 | 0.759 |
| Malay | Saya boleh dapatkan maklumat kesihatan yang mudah difahami apabila diperlukan. |
| HL8 | *English* | *I can judge how my behaviour affects my health.* | 0.462 | 0.791 | 0.487 | 0.763 |
| Malay | Saya boleh menilai bagaimana tingkah laku saya mempengaruhi kesihatan saya. |
| HL9 | *English* | *I can usually figure out if some health-related information is right or wrong.* | 0.481 | 0.789 | 0.486 | 0.764 |
| Malay | Saya boleh menilai sama ada maklumat kesihatan itu betul atau salah. |
| HL10 | *English* | *I can give reasons for the choices I make regarding my health* | 0.606 | 0.773 | 0.457 | 0.791 |
| Malay | Saya boleh berikan sebab di atas pilihan yang saya ambil berkaitan kesihatan saya. |

Note. Item–total correlations ≥ 0.30 indicate acceptable item contribution to scale reliability.
