# Supplementary material
Source: Research Square preprint supplement (doi:10.21203/rs.3.rs-9067396/v1)
Supplement: Supplementary file 3 [file ab6712f42478b6eaef6f7f9b.docx]

**Translation and cultural validation**

Table 1. Translation and Validation Procedures for the Malay Version of the HLSAC Questionnaire

| **Phase** | **Step** | **Description** | **Participants** | **Method / Output** |
| --- | --- | --- | --- | --- |
| **Translation** | Forward translation | Translation of the original HLSAC questionnaire into Malay | 2 bilingual translators | First draft of Malay version |
|  | Backward translation | Translation of the Malay version back into English | 2 bilingual translators | Reviewed the Malay version (HLSAC_M0) |
| **Validation** | Face validity (adolescents) | Evaluation of item comprehensibility, clarity of meaning, appropriateness of terminology, and sentence structure | 5 adolescents | Focus group discussion (FGD) /HLSAC_M0.1 |
|  | Translation validation (experts) | Assessment of language equivalence and equivalence of meaning | 6 experts | Structured checklist (Google Form) |
| **Finalisation** | Final instrument | Finalised Malay version of the HLSAC questionnaire | — | HLSAC_M1 |

Note. The translation process followed a forward–backward approach. Validation procedures involved both target population assessment and expert review to ensure linguistic and conceptual equivalence.

**Validation: Focus Group Discussion (FGD)**

Instrument : Health Literacy School Age Children (HLSAC), 10 item, Malay version (HLSAC_M0.1)

Participant : Adolescents

Number of participants : 5

Age : 12-16

Date : 29 December 2024

Objective : Validate the Malay translation – terminology, words, sentences

Table 2 : Finding from FGD for face validity among participants

| **Item** | **Original Item (English)** | Malay translation (HLSAC_M0) | **Key Issues Identified by Participants** | **Revision Rationale / Action Taken** |
| --- | --- | --- | --- | --- |
| *S0* | *Answer choices :  (1) Not at all true (2) Not quite true (3) Somewhat true (4) Absolutely true* | Pilihan jawapan :  (1) Tidak betul sama sekali (2) Tidak begitu betul  (3) Agak betul (4) Sangat betul | Response options were clear and understandable. | No revision required |
| *S1* | *I am confident that, I have good information about health.* | Saya yakin bahawa, saya mempunyai maklumat yang baik tentang kesihatan. | Phrase *“I am confident that / saya yakin”* perceived as unnecessary; sentence felt long and slightly confusing | Sentence simplified by removing redundant phrasing to improve readability |
| *S2** | *I am confident that, I am able to give ideas on how to improve health in my immediate surroundings, when it necessory (e.g. a nearby place or area, family, friends).* | Saya yakin bahawa, saya boleh memberi idea kepada orang sekeliling saya cara untuk meningkatkan kesihatan, apabila diperlukan (contohnya, kepada keluarga, kawan-kawan, jiran, taman perumahan / kampung saya). | Sentence too long and confusing; the term *“ideas”* is perceived as abstract | The term *“idea”* was replaced with *“pandangan”*; the sentence was shortened, and examples simplified |
| *S3* | *I am confident that, I can compare health-related information from different sources.* | saya yakin bahawa, saya boleh membandingkan maklumat berkaitan kesihatan daripada pelbagai sumber. | Item clearly understood | No revision required |
| *S4** | *I am confident that, I can follow the instructions given to me by healthcare (e.g. nurse, doctor).* | Saya yakin bahawa, saya boleh mengikuti arahan yang diberikan oleh kakitangan kesihatan kepada saya (contohnya, jururawat, doktor). | Meaning generally understood; suggestion to clarify action-oriented intent | The term *“instructions”* clarified to *“guidance/advice (panduan/nasihat)”* |
| The term *“kakitangan kesihatan”* is perceived as limited to doctors/nurses; *“instructions”* are unclear. | Replaced with *“anggota kesihatan”* and clarified, giving others an example of anggota kesihatan |
| *S5** | *I am confident that, I can easily give examples of things that promote health.* | Saya yakin bahawa, saya dengan mudah boleh memberikan contoh perkara yang mempromosikan kesihatan. | The term *“promote/ promosi”* is not clearly understood in Malay as the intended meaning of the item in the English version. | Replaced *“promosi”* with another word in Malay. |
| *S6** | *I am confident that, I can judge how my own actions affect the surrounding natural environment.* | Saya yakin saya boleh menilai bagaimana tindakan saya mempengaruhi persekitaran secara semula jadi di sekeliling saya. | *Natural/ “*secara semula jadi di sekeliling saya” -confusing  Participants associated the term “persekitaran” with the natural environment. | Recommended removing the phrase “secara semula jadi” to avoid ambiguity. |
| *S7* | *I am confident, I can find health-related information that is easy for me to understand when necesasery.* | Saya yakin, saya boleh mendapatkan maklumat berkaitan kesihatan yang mudah untuk saya fahami apabila diperlukan. | Item clearly understood | No revision required |
| *S8* | *I am confident I can judge how my behaviour affects my health* | Saya yakin saya boleh menilai bagaimana tingkah laku saya mempengaruhi kesihatan saya. | Item clearly understood | No revision required |
| *S9** | *I am confident I can usually figure out if some health-related information is right or wrong.* | Saya yakin, pada kebiasaanya saya boleh mengetahui maklumat berkaitan kesihatan itu betul atau salah. | The word *“mengetahui”* is perceived as factual knowledge rather than critical thinking. | Revised wording to emphasise evaluation and judgement |
| *S10* | *I am confident I can give reasons for the choices I make regarding my health.* | Saya yakin saya boleh memberikan sebab bagi pilihan yang saya buat berkaitan dengan kesihatan saya. | Item clearly understood | No revision required |
|  | Overall |  | The questionnaire is generally clear and understandable; a suggestion to simplify sentence structures. | Minor revisions were applied across selected items to enhance clarity. |

Note :components: theoretical knowledge (1, 5), practical knowledge (4, 7), critical thinking (3, 9), self-awareness (8, 10) and citizenship (2, 6) (Paakkari & Paakkari 2012). * The item was reassessed through a follow-up focus group discussion with the same participants to confirm clarity and appropriateness of the revised terminology.

**Calculation Translation Validation by Expert**

1. Language equivalence

| Very equivalent |  |  | Moderately equivalent |  |  | Very not equivalent |
| --- | --- | --- | --- | --- | --- | --- |
| 1 | 2 | 3 | 4 | 5 | 6 | 7 |

b) Equivalence of meaning

| Very similar |  |  | Moderately similar |  |  | Very not similar |
| --- | --- | --- | --- | --- | --- | --- |
| 1 | 2 | 3 | 4 | 5 | 6 | 7 |

Table 3. Expert review rating calculation

| Q /Exp | Language equivalence | | | | | | | | Equivalence of meaning | | | | | | | | Sum of Avg. | Avg sum |
| --- | --- | --- | --- | --- | --- | --- | --- | --- | --- | --- | --- | --- | --- | --- | --- | --- | --- | --- |
| P1 | P2 | P3 | P4 | P5 | P6 | SUM | Avg.1 | P1 | P2 | P3 | P4 | P5 | P6 | SUM | Avg.2 |
| S0 | 1 | 1 | 2 | 1 | 4 | 1 | 10 | 1.7 | 1 | 2 | 2 | 4 | 1 | 1 | 11 | 1.8 | 3.5 | 1.8 |
| S1 | 1 | 1 | 1 | 1 | 1 | 1 | 6 | 1.0 | 1 | 1 | 1 | 1 | 4 | 1 | 9 | 1.5 | 2.5 | 1.3 |
| S2 | 1 | 2 | 3 | 5 | 2 | 1 | 14 | 2.3 | 1 | 2 | 3 | 1 | 5 | 2 | 14 | 2.3 | 4.7 | 2.3 |
| S3 | 1 | 1 | 1 | 1 | 1 | 1 | 6 | 1.0 | 1 | 2 | 1 | 1 | 1 | 1 | 7 | 1.2 | 2.2 | 1.1 |
| S4 | 1 | 2 | 1 | 1 | 1 | 1 | 7 | 1.2 | 1 | 2 | 1 | 1 | 1 | 1 | 7 | 1.2 | 2.3 | 1.2 |
| S5 | 1 | 2 | 2 | 4 | 1 | 1 | 11 | 1.8 | 1 | 2 | 2 | 1 | 4 | 2 | 12 | 2.0 | 3.8 | 1.9 |
| S6 | 1 | 1 | 3 | 3 | 1 | 1 | 10 | 1.7 | 1 | 1 | 3 | 1 | 2 | 1 | 9 | 1.5 | 3.2 | 1.6 |
| S7 | 1 | 1 | 2 | 1 | 1 | 1 | 7 | 1.2 | 1 | 1 | 2 | 1 | 1 | 1 | 7 | 1.2 | 2.3 | 1.2 |
| S8 | 1 | 1 | 2 | 1 | 1 | 1 | 7 | 1.2 | 1 | 1 | 2 | 1 | 1 | 1 | 7 | 1.2 | 2.3 | 1.2 |
| S9 | 1 | 1 | 3 | 1 | 1 | 1 | 8 | 1.3 | 1 | 1 | 3 | 1 | 1 | 1 | 8 | 1.3 | 2.7 | 1.3 |
| S10 | 1 | 2 | 2 | 1 | 1 | 1 | 8 | 1.3 | 1 | 2 | 2 | 1 | 1 | 1 | 8 | 1.3 | 2.7 | 1.3 |

Note: > 2.5 requires back translation and >1.6 <2.6 **problematic** and requires **further refinement,** while the **ideal mean score** is **1**

Table 4. Reassessment expert review - Problematic question average sum >1.6 <2.6

| Q /Exp | Language equivalence | | | | | | | | Equivalence of meaning | | | | | | | | Sum of Avg. | Avg sum |
| --- | --- | --- | --- | --- | --- | --- | --- | --- | --- | --- | --- | --- | --- | --- | --- | --- | --- | --- |
| P1 | P2 | P3 | P4 | P5 | P6 | SUM | Avg.1 | P1 | P2 | P3 | P4 | P5 | P6 | SUM | Avg.2 |
| S0 |  | 1 | 1 | 1 | 1 |  | 4 | 1.0 |  | 1 | 1 | 1 | 1 | 1 | 5 | 1.0 | 2.0 | 1.0 |
| S2 |  | 1 | 1 | 2 | 1 |  | 5 | 1.3 |  | 1 | 1 | 1 | 2 | 1 | 6 | 1.2 | 2.5 | 1.2 |
| S5 |  | 1 | 1 | 1 | 1 |  | 4 | 1.0 |  | 1 | 2 | 1 | 2 | 1 | 7 | 1.4 | 2.4 | 1.2 |
| S6 |  | 1 | 2 | 1 | 1 |  | 5 | 1.3 |  | 1 | 2 | 1 | 1 | 1 | 6 | 1.2 | 2.5 | 1.2 |

Table 5: Final Question HLSAC Malay version after expert review (HLSAC_M0.3)

|  | Original version | Malay translation | Changes have been made |
| --- | --- | --- | --- |
| *S0* | *Answer choices :  (1) Not at all true*  *(2) Not quite true (3) Somewhat true (4) Absolutely true* | Pilihan jawapan :  (1) Tidak benar sama sekali (2) Tidak begitu benar (3) Agak benar (4) Sangat benar | “betul” into “benar” |
|  | *I am confident that,* | Saya yakin ....... |  |
| *S1* | *I have good information about health.* | Saya mempunyai maklumat yang baik tentang kesihatan. |  |
| *S2* | *I am able to give ideas on how to improve health in my immediate surroundings, when it necessory (e.g. a nearby place or area, family, friends).* | Saya boleh memberi pandangan (idea) dengan orang lain di sekeliling saya untuk meningkatkan kesihatan mereka (contohnya, kepada keluarga, kawan-kawan, jiran). | Ideas – pandangan (idea) |
| *S3* | *I can compare health-related information from different sources.* | Saya boleh membandingkan maklumat berkaitan kesihatan daripada pelbagai sumber. |  |
| *S4* | *I can follow the instructions given to me by healthcare (e.g. nurse, doctor, health education officer).* | Saya boleh mengikuti nasihat /panduan yang diberikan oleh anggota kesihatan (contohnya, jururawat, doktor, pegawai pendidikan kesihatan). |  |
| *S5* | *I can easily give examples of things that promote health.* | Saya dengan mudah boleh memberi contoh perkara yang menggalakan penjagaan kesihatan. | Promosi - menggalakkan |
| *S6* | *I can judge how my own actions affect the surrounding natural environment.* | Saya boleh menilai bagaimana tindakan saya memberi kesan kepada sekeliling saya | *Natural – not mentioned in the Malay version because the participant understood that the environment is something natural.* |
| *S7* | *I can find health-related information that is easy for me to understand when necesasery.* | Saya boleh dapatkan maklumat kesihatan yang mudah difahami apabila diperlukan. |  |
| *S8* | *I can judge how my behaviour affects my health.* | Saya boleh menilai bagaimana tingkah laku saya mempengaruhi kesihatan saya. |  |
| *S9* | *I can usually figure out if some health-related information is right or wrong.* | Saya boleh menilai sama ada maklumat kesihatan itu betul atau salah. | Translation Malay-English: “I can assess whether the health information is correct or incorrect*.”* |
| *S10* | *I can give reasons for the choices I make regarding my health* | Saya boleh berikan sebab di atas pilihan yang saya ambil berkaitan kesihatan saya. |  |

Refference

Sperber, A. D. (2004). Translation and Validation of Study Instruments for Cross-Cultural Research. *Gastroenterology*, *126*(1), 124–128. https://doi.org/10.1053/j.gastro.2003.10.016
