# Supplementary material
Source: Research Square preprint supplement (doi:10.21203/rs.3.rs-9067396/v1)
Supplement: Supplementary file 4 [file e0bc3fe15ffb65ca2924956d.docx]

**Content validity**

1. **Essential (CVR)**

**Scale : (1) not essential at all (2) almost essential (3) essential (4) very essential**

**Rating : 1 & 2 = 0 , 3 & 4 = 1**

**Table 1. Content validity ratio rating calculation**

|  | P1 | P2 | P3 | P4 | P5 | P6 | P7 | P8 | P9 |  | Rater in aggrement |  | Decision |
| --- | --- | --- | --- | --- | --- | --- | --- | --- | --- | --- | --- | --- | --- |
| S1 | 1 | 1 | 1 | 1 | 1 | 1 | 1 | 1 | 1 |  | 9 | **1** | Retained |
| S2 | 1 | 1 | 1 | 1 | 1 | 1 | 1 | 1 | 1 |  | 9 | **1** | Retained |
| S3 | 1 | 1 | 1 | 1 | 1 | 1 | 1 | 1 | 1 |  | 9 | **1** | Retained |
| S4 | 1 | 1 | 1 | 1 | 1 | 1 | 1 | 1 | 1 |  | 9 | **1** | Retained |
| S5 | 1 | 1 | 1 | 1 | 1 | 1 | 1 | 1 | 1 |  | 9 | **1** | Retained |
| S6 | 1 | 1 | 1 | 1 | 1 | 1 | 1 | 1 | 1 |  | 9 | **1** | Retained |
| S7 | 1 | 1 | 1 | 1 | 1 | 1 | 1 | 1 | 1 |  | 9 | **1** | Retained |
| S8 | 1 | 1 | 1 | 1 | 1 | 1 | 1 | 1 | 1 |  | 9 | **1** | Retained |
| S9 | 1 | 1 | 1 | 1 | 1 | 1 | 1 | 1 | 1 |  | 9 | **1** | Retained |
| S10 | 1 | 1 | 1 | 1 | 1 | 1 | 1 | 0 | 1 |  | 8 | **0.78** | Retained |
|  | 10 | 10 | 10 | 10 | 10 | 10 | 10 | 9 | 10 |  |  |  |  |
|  | **1** | **1** | **1** | **1** | **1** | **1** | **1** | **0.9** | **1** |  | **SUM-CVR** | **8.78** |  |
|  |  |  |  |  |  |  |  |  |  |  | **SUM CVR/Ave** | **0.88** |  |
|  |  |  |  |  |  |  |  |  |  |  |  |  |  |
|  |  |  |  |  |  |  | **S-CVR** | | **8.9** |  |  |  |  |
|  |  |  |  |  |  |  | **S-CVR/Ave** | | **0.78** |  |  |  |  |

Ne= Number of experts rating the item as 3 or 4

N = Number of experts

A score CVR >0.78 is acceptable for nine expert raters (Ayre & Scally, 2014; Lawshe, 1975; Lynn, 1986; Yusoff, 2019; Zamanzadeh et al., 2015)

1. **Relevant (CVI)**

**Scale : (1) not relevant at all (2) almost relevant (3) relevant (4) very relevant**

**Rating : 1 & 2 = 0 , 3 & 4 = 1**

**Table 2. Content validity index (CVI) rating calculation**

|  | P1 | P2 | P3 | P4 | P5 | P6 | P7 | P8 | P9 |  | Rater in aggrement (3&4=1) |  | UA | |
| --- | --- | --- | --- | --- | --- | --- | --- | --- | --- | --- | --- | --- | --- | --- |
| S1 | 1 | 1 | 1 | 1 | 1 | 1 | 1 | 1 | 1 |  | 9 | 1.0 | 1 | |
| S2 | 1 | 1 | 1 | 1 | 1 | 1 | 1 | 1 | 1 |  | 9 | 1.0 | 1 | |
| S3 | 1 | 1 | 1 | 1 | 1 | 1 | 1 | 1 | 1 |  | 9 | 1.0 | 1 | |
| S4 | 1 | 1 | 1 | 1 | 1 | 1 | 1 | 1 | 1 |  | 9 | 1.0 | 1 | |
| S5 | 1 | 1 | 1 | 1 | 1 | 1 | 1 | 1 | 1 |  | 9 | 1.0 | 1 | |
| S6 | 1 | 1 | 1 | 0 | 1 | 1 | 1 | 1 | 1 |  | 8 | 0.9 | 0 | |
| S7 | 1 | 1 | 1 | 1 | 1 | 1 | 1 | 1 | 1 |  | 9 | 1.0 | 1 | |
| S8 | 1 | 1 | 1 | 1 | 1 | 1 | 1 | 1 | 1 |  | 9 | 1.0 | 1 | |
| S9 | 1 | 1 | 1 | 1 | 1 | 1 | 1 | 1 | 1 |  | 9 | 1.0 | 1 | |
| S10 | 1 | 1 | 1 | 1 | 1 | 1 | 1 | 1 | 1 |  | 9 | 1.0 | 1 | |
|  | 10 | 10 | 10 | 9 | 10 | 10 | 10 | 10 | 10 |  | **SUM I-CVI** | **9.89** |  | |
|  |  |  |  |  |  |  |  |  |  |  | **SUM-CVI/Ave** | **0.99** |  | |
|  | **1** | **1** | **1** | **0.9** | **1** | **1** | **1** | **1** | **1** |  |  | **SUM-CVI** | 9 | |
|  |  |  |  |  |  |  |  |  |  |  |  | **SUM-CVI/UA** | **0.90** | |
|  |  |  |  |  |  |  | **S-CVI** | | **8.9** |  |  |  |  |
|  |  |  |  |  |  |  | **S-CVI/Ave** | | **0.99** |  |  |  |  |

Ne= Number of experts rating the item as 3 or 4

N = Number of experts

A score CVI >0.78 is acceptable for nine expert raters (Ayre & Scally, 2014; Lawshe, 1975; Lynn, 1986; Yusoff, 2019; Zamanzadeh et al., 2015)

References

Ayre, C., & Scally, A. J. (2014). Critical values for Lawshe’s content validity ratio: Revisiting the original methods of calculation. *Measurement and Evaluation in Counseling and Development*, *47*(1), 79–86. https://doi.org/10.1177/0748175613513808

Lawshe, C. H. (1975). A quantitative approach to content validity”.Personnel Psychology. *Personnel Psychology*, *28*, 563–575.

Lynn, M. R. (1986). Determination and quantification of content validity. In *Nursing Research* (Vol. 35, Issue 6, pp. 382–386). http://ijoh.tums.ac.ir/index.php/ijoh/article/view/26

Yusoff, M. S. B. (2019). ABC of Content Validation and Content Validity Index Calculation. *Education in Medicine Journal*, *11*(2), 49–54. https://doi.org/10.21315/eimj2019.11.2.6

Zamanzadeh, V., Ghahramanian, A., Rassouli, M., Abbaszadeh, A., Alavi-Majd, H., & Nikanfar, A.-R. (2015). Design and Implementation Content Validity Study: Development of an instrument for measuring Patient-Centered Communication. *Journal of Caring Sciences*, *4*(2), 165–178. https://doi.org/10.15171/jcs.2015.017
